# Supplementary material
Source: MDPI journal article supplement (https://www.mdpi.com/1424-8247/17/2/205)
Supplement: s1 [file s1]

**Supplementary Table S1. Serious cases associated with acute central respiratory depression**

| N (%)                                                                | Tramadol<br>(N=938) | Tramadol/paracetamol<br>(N=94) |
|----------------------------------------------------------------------|---------------------|--------------------------------|
| <b>Seriousness<sup>a</sup></b>                                       |                     |                                |
| Caused/Prolonged hospitalization                                     | 415 (35.9%)         | 47 (43.5%)                     |
| Life-threatening                                                     | 232 (20.1%)         | 28 (25.9%)                     |
| Death                                                                | 382 (33.0%)         | 26 (24.1%)                     |
| Disabling/Incapacitating                                             | 14 (1.2%)           | 0 (0%)                         |
| Other                                                                | 327 (28.3%)         | 33 (30.6%)                     |
| Unknown                                                              | 224 (19.4%)         | 16 (14.8%)                     |
| <b>Outcome of serious AEs associated with respiratory depression</b> |                     |                                |
| Died-reaction may be contributory                                    | 9 (0.8%)            | 1 (0.9%)                       |
| Died-unrelated to reaction                                           | 1 (0.1%)            | 0 (0%)                         |
| Recovered                                                            | 399 (34.5%)         | 43 (39.8%)                     |
| Recovering                                                           | 42 (3.6%)           | 15 (13.9%)                     |
| Recovered with sequelae                                              | 7 (0.6%)            | 1 (0.9%)                       |
| Not recovered                                                        | 26 (2.6%)           | 4 (3.7%)                       |
| Fetal                                                                | 207 (17.9%)         | 15 (13.9%)                     |
| Unknown                                                              | 229 (19.8%)         | 29 (26.9%)                     |
| <b>Actions taken to address AEs</b>                                  |                     |                                |
| Drug withdrawn                                                       | 284 (24.6%)         | 46 (42.6%)                     |
| Dose not changed                                                     | 26 (2.3%)           | 2 (1.9%)                       |
| Dose reduced                                                         | 4 (0.4%)            | 2 (1.9%)                       |
| Dose increased                                                       | 2 (0.2%)            | 0 (0%)                         |
| Not applicable                                                       | 184 (15.9%)         | 17 (15.7%)                     |
| Unknown                                                              | 657 (56.8%)         | 21 (38.0%)                     |
| <b>Outcomes after actions</b>                                        |                     |                                |
| Reaction abated                                                      | 359 (31.0%)         | 51 (47.2%)                     |
| No effect observed                                                   | 25 (2.2%)           | 4 (3.7%)                       |
| Effect unknown                                                       | 166 (14.4%)         | 11 (10.2%)                     |
| Fetal                                                                | 133 (11.5%)         | 13 (12.0%)                     |
| Not applicable                                                       | 67 (5.8%)           | 0 (0%)                         |
| Unknown                                                              | 407 (35.2%)         | 29 (26.9%)                     |

Serious cases included reports related to respiratory depression regardless of positive signals.

<sup>a</sup> Cases reported with one or more than two kinds of seriousness.

**Supplementary Table S2. Detected signal in pediatrics reported acute central respiratory depression**

| Adverse events         | Age group            | Tramadol (N=140,721) above full database |                        |                        |                   |
|------------------------|----------------------|------------------------------------------|------------------------|------------------------|-------------------|
|                        |                      | No. of reports                           | ROR (CI)               | PRR (CI)               | IC <sub>025</sub> |
| Respiratory arrest     | 28 days to 23 months | 7                                        | 14.6<br>(6.85-31.1)    | 14.1<br>(6.79-29.1)    | 1.65              |
|                        | 2 - 11 years         | 9                                        | 13.6<br>(7.01-26.3)    | 13.5<br>(6.99-25.9)    | 1.92              |
|                        | 12 - 17 years        | 8                                        | 2.88<br>(1.43-5.80)    | 2.88<br>(1.43-5.78)    | 0.19              |
| Respiratory depression | 28 days to 23 months | 11                                       | 115.9<br>(62.4-125)    | 108.9<br>(60.8-195)    | 3.27              |
|                        | 2 - 11 years         | 7                                        | 13.98<br>(6.61-29.6)   | 13.88<br>(6.60-29.2)   | 1.63              |
|                        | 12 - 17 years        | 20                                       | 13.5<br>(8.59-21.3)    | 13.4<br>(8.56-21.1)    | 2.60              |
| Bradypnoea             | 28 days to 23 months | 4                                        | 148.17<br>(53.8-408.3) | 144.91<br>(53.7-390.8) | 1.35              |
|                        | 2 - 11 years         | 4                                        | 56.93<br>(20.7-159.9)  | 56.68<br>(20.7-155.6)  | 1.23              |
|                        | 12 - 17 years*       | 4                                        | 15.61<br>(5.64-43.2)   | 15.60<br>(5.64-43.1)   | 0.80              |
| Hypoventilation        | 28 days to 23 months | 6                                        | 48.84<br>(21.5-110.9)  | 47.25<br>(21.4-104.4)  | 1.99              |
|                        | 2 - 11 years         | 3                                        | 9.29<br>(2.97-29.03)   | 9.26<br>(2.97-28.84)   | 0.03              |
|                        | 12 - 17 years        | 4                                        | 5.42<br>(2.01-14.64)   | 5.41<br>(2.01-14.60)   | 0.10              |

\*Tramadol/paracetamol: No. of reports 3, PRR 66.21 (20.6-212.8), ROR 65.79 (20.62-209.9), IC<sub>025</sub> 0.62

CI, Confidence Interval

**Supplementary Table S3. Frequent concomitant medications in ACRD cases of tramadol and tramadol/paracetamol**

| Concomitant medications         | Tramadol           | Tramadol/paracetamol |
|---------------------------------|--------------------|----------------------|
| <b>Opioids</b>                  | <b>370 (32.0%)</b> | <b>16 (14.8%)</b>    |
| Oxycodone                       | 106 (9.16%)        | 5 (4.63%)            |
| Morphine                        | 102 (8.82%)        | 4 (3.70%)            |
| Hydrocodone/paracetamol         | 79 (6.83%)         | 1 (0.93%)            |
| Fentanyl                        | 78 (6.74%)         | 4 (3.70%)            |
| Methadone                       | 44 (3.80%)         | 1 (0.93%)            |
| Oxycodone/paracetamol           | 42 (3.63%)         | 1 (0.93%)            |
| Hydromorphone                   | 41 (3.54%)         | 0 (0%)               |
| Hydrocodone                     | 25 (2.16%)         | 0 (0%)               |
| Codeine/paracetamol             | 22 (1.90%)         | 3 (2.78%)            |
| <b>Benzodiazepines</b>          | <b>257 (22.2%)</b> | <b>21 (19.4%)</b>    |
| Diazepam                        | 85 (7.35%)         | 6 (5.56%)            |
| Alprazolam                      | 81 (7.00%)         | 5 (4.63%)            |
| Clonazepam                      | 56 (4.84%)         | 6 (5.56%)            |
| Lorazepam                       | 45 (3.89%)         | 1 (0.93%)            |
| Benzodiazepine derivatives      | 24 (2.07%)         | 3 (2.78%)            |
| <b>Pain relievers</b>           | <b>207 (17.9%)</b> | <b>15 (13.9%)</b>    |
| Paracetamol                     | 121 (10.46%)       | 7 (6.48%)            |
| Ibuprofen                       | 37 (3.20%)         | 2 (1.85%)            |
| Diclofenac                      | 30 (2.59%)         | 2 (1.85%)            |
| Acetylsalicylic acid            | 29 (2.51%)         | 6 (5.56%)            |
| Naproxen                        | 28 (2.42%)         | 1 (0.93%)            |
| <b>Anesthetics or Hypnotics</b> | <b>83 (7.2%)</b>   | <b>8 (7.4%)</b>      |
| Zolpidem                        | 54 (4.67%)         | 8 (7.41%)            |
| Propofol                        | 29 (2.51%)         | 0 (0%)               |
| <b>Antidepressants</b>          | <b>232 (20.1%)</b> | <b>19 (17.6%)</b>    |
| Amitriptyline                   | 53 (4.58%)         | 3 (2.78%)            |
| Citalopram                      | 48 (4.15%)         | 0 (0%)               |
| Fluoxetine                      | 33 (2.85%)         | 1 (0.93%)            |
| Trazodone                       | 33 (2.85%)         | 1 (0.93%)            |
| Venlafaxine                     | 33 (2.85%)         | 4 (3.70%)            |
| Sertraline                      | 25 (2.16%)         | 5 (4.63%)            |
| Duloxetine                      | 24 (2.07%)         | 5 (4.63%)            |

|                         |                 |                   |                   |
|-------------------------|-----------------|-------------------|-------------------|
|                         | Mirtazapine     | 22 (1.90%)        | 1 (0.93%)         |
|                         | Bupropion       | 21 (1.82%)        | 2 (1.85%)         |
| <b>Anticonvulsants</b>  |                 | <b>102 (8.8%)</b> | <b>21 (19.4%)</b> |
|                         | Gabapentin      | 67 (5.79%)        | 3 (2.78%)         |
|                         | Pregabalin      | 39 (3.37%)        | 18 (16.67%)       |
| <b>Muscle relaxants</b> |                 | <b>85 (7.3%)</b>  | <b>8 (7.4%)</b>   |
|                         | Cyclobenzaprine | 41 (3.54%)        | 5 (4.63%)         |
|                         | Baclofen        | 23 (1.99%)        | 3 (2.78%)         |
|                         | Carisoprodol    | 23 (1.99%)        | 1 (0.93%)         |
| <b>Antihistamines</b>   |                 | <b>51 (4.4%)</b>  | <b>1 (0.9%)</b>   |
|                         | Diphenhydramine | 32 (2.77%)        | 0 (0%)            |
|                         | Hydroxyzine     | 21 (1.82%)        | 1 (0.93%)         |
| <b>Others</b>           |                 |                   |                   |
|                         | Ethanol         | 36 (3.11%)        | 2 (1.85%)         |
|                         | Omeprazole      | 30 (2.59%)        | 7 (6.48%)         |
|                         | Quetiapine      | 26 (2.25%)        | 3 (2.78%)         |
|                         | Amlodipine      | 25 (2.16%)        | 6 (5.56%)         |
|                         | Levothyroxine   | 24 (2.07%)        | 1 (0.93%)         |
|                         | Furosemide      | 22 (1.90%)        | 6 (5.56%)         |

Table was presented with concomitant medications for reported more than 20 cases in tramadol and one case reported with none or more than one kind of concomitant medication.

Among 112 ACRD cases ≤17 years, 44.6% were concomitant with other medicines (50 cases), while adults aged over 18 years showed 76.2% of concomitant cases (656 cases) among 861 cases.
